# Supplementary material for: Multi-functional integrated design of a copper foam-based cathode for high-performance lithium–oxygen batteries
Source: Royal Society of Chemistry journal article supplement (doi:10.1039/d4nr00263f), 2024-01-01
Supplement: d4nr00263f1.pdf [file d4nr00263f1.pdf]

Supporting Information

**Multi-Functional Integrated Design of High-Performance Cathode for  
Lithium-Oxygen Batteries**

Jing Lan, Yuran Yu, Fujun Miao\*, Peng Zhang\* and Guosheng Shao\*

State Center for International Cooperation on Designer Low-Carbon and  
Environmental Materials (CDLCEM), School of Materials Science and  
Engineering, Zhengzhou University, 100 Kexue Avenue, Zhengzhou  
450001, China

Zhengzhou Materials Genome Institute (ZMGI), Zhongyuanzhigu,  
Xingyang, Zhengzhou 450100, China

\*Corresponding author: miaofj@zzu.edu.cn; zhangp@zzu.edu.cn;  
gsshao@zzu.edu.cn

## **Synthesis and Preparation**

**Chemicals and Materials :** Cu Foam was obtained from Tianjin Yingke Haozhi Technology Co. Ltd. Ammonium persulfate ( $(\text{NH}_4)_2\text{S}_2\text{O}_8$ ), Sodium hydroxide (NaOH), Ethyl alcohol ( $\text{C}_2\text{H}_6\text{O}$ ),  $\text{NH}_3 \cdot \text{H}_2\text{O}$  were purchased from Sinopharm Chemical Reagent Co. Ltd. Sodium citrate(99%), Gold chloride trihydrate( $\text{HAuCl}_4 \cdot 3\text{H}_2\text{O}$ ), tetraethylene glycol dimethyl ether (TEGDME), and lithium bis(trifluoromethanesulphonyl)imide (LiTFSI), Lithium nitrate ( $\text{LiNO}_3$ , 99.99%) and Lithium iodide (LiI, 99.9%), were purchased from Aladdin Reagent.

**Synthesis of CuFo-Cu(OH)<sub>2</sub> nanowires :** Cu foam (CuFo) was cleaned with hydrochloric acid, and ethanol, distilled water three times, and vacuumized. The cleaned CuFo (tailored into circle shape with a diameter of 12mm) was then immersed into a mixed solution of  $(\text{NH}_4)_2\text{S}_2\text{O}_8$  (0.75 M) and NaOH (1.875 M) for 20 min at room temperature, ensuring  $\text{Cu(OH)}_2$  grown on CuFo (CuFo-Cu(OH)<sub>2</sub> nanowires). The sample was taken out from the solution, washed with distilled water three times, dried at 60 °C in air.

**Preparation of CuFo-Cu@C Nanowires :** The as prepare CuFo-Cu(OH)<sub>2</sub> Nanowires was soaked in a mixture of 20 mL ethanol, 4 ml distilled water, 1.5 mL ammonia solution, 0.225 mL formaldehyde solution and 0.15 g resorcinol overnight. By annealing the above obtained CuFo-

Cu(OH)<sub>2</sub>@resorcinol formaldehyde (RF) nanowires in a tube furnace at 500°C for 0.5 h under Ar atmosphere and continue to heat up to 700°C for 0.5 h at a heating rate of 2°C min<sup>-1</sup> under the 8% Ar/H<sub>2</sub> atmosphere, the CuFo-Cu@C Nanowires was fabricated. Moreover, the direct reduction of as-prepared CuFo-Cu(OH)<sub>2</sub> nanowires was at 400 °C for 0.5 h under 8% Ar/H<sub>2</sub> atmosphere, denoting as CuFo-Cu. It should be noted that the Cu-based nanowires would be disappeared if without the protection of function coating layer.

**Preparation of CuFo-Cu@C/Au nanowires and CuFo-Cu/Au :** To prepare gold nanoparticles on CuFo-Cu@C nanowires, a classic recipe was used. Typically, 1 ml sodium citrate was diluted in 100 ml water. After the solution to boiling, 200 ul chloroauric acid (HAuCl<sub>4</sub>, 0.5 M) and the CuFo-Cu@C NWs were quickly injected. The reaction was allowed for 10 min and the sample was taken out from the solution to obtain the CuFo-Cu@C/Au NWs. The CuFo-Cu/Au could be obtained by the same method.

**Characterization:** The morphologies and detailed structures of samples were investigated by Scanning Electronic Microscopy (SEM, ZEISS SIGMA 500, operating at 5 kV attached with a Bruker energy dispersive X-ray spectrometer); Transmission Electron Microscope (TEM), Scanning Transmission Electron Microscopy (STEM), X-ray Photoelectron Spectroscopy (XPS) was carried out on AXIS Supra and all data were calibrated with the C 1s of 284.8 eV , Energy Dispersive X-ray

spectroscopy (EDX) and Selected Area Electron Diffraction (SAED) were operated at 200 kV with a cold field emission source (FEI Tecnai G2 F20). Raman spectrum was on Horiba LabRAM HR Evolution Spectrometer with a 532 nm excitation wavelength; X-ray Diffraction (XRD) was conducted using a Rigaku Ultima IV system with Cu K $\alpha$  radiation. Nitrogen adsorption/desorption isotherm was analyzed on an ASAP 2020.

**Li-O<sub>2</sub> battery assemble and test:** The assemble processes of 2032-type coin cells were conducted in an Ar-filled glove box, in which the lithium foil, the obtained CuFo-Cu@C/Au NWs (with a diameter of 12 nm), and a glass fiber serves as anode, cathode and separator, respectively. The applied electrolyte of TEGDME with containing 1 M LiTFSI with 0.2 M LiNO<sub>3</sub> and 0.2 M LiI with a dosage of 100  $\mu$ L. The electrochemical performances of the cathodes were examined at a limited capacity with different current densities. The charge-discharge curve and cycle performance was performed by a Land CT2001A battery analyzer. The EIS study was conducted by the CHI660 electrochemical station with a frequency between 10 mHz and 100 kHz. The cyclic voltammetry (CV) curves were carried out between 2.0 and 4.5 V with a scan rate of 1 mV s<sup>-1</sup>

**Computational simulation:** Theoretical calculations were performed in the framework of the density functional theory (DFT), using the Vienna Ab Initio Simulation Package (VASP),<sup>1,2</sup> with the projector augmented wave

(PAW) method with a cutoff energy of 500 eV for the ionic potentials including the overall effect of core electrons.<sup>3,4</sup> For the geometric relaxation of the structures, summation over the Brillouin Zone (BZ) is performed with  $3 \times 3 \times 2$  Monkhorst-Pack k-point meshes for the Au-C plane (82 atoms). Slab model for Au-C layer was constructed with a vacuum layer of 15 Å in the z direction to avoid the interaction between layers. Optimized structures were obtained by minimizing the forces on each ion until they fell below 0.05 eV/Å.<sup>5</sup> The Density of States needs to be calculated to elucidate the catalytic performance of different materials using the hybrid functionals HSE06.<sup>6-9</sup> All calculations were spin-polarized. the Gibbs free energy of each reaction step can be expressed as:

$$\Delta G_1 = \left( G_{LiO_2^*} + 3G_{Li} \right) - \left( G_* + G_{O_2} + 4G_{Li} \right) \quad (1)$$

$$\Delta G_2 = \left( G_{Li_2O_2^*} + 2G_{Li} \right) - \left( G_{LiO_2^*} + 3G_{Li} \right) \quad (2)$$

$$\Delta G_3 = \left( G_{(Li_2O_2)_2^*} \right) - \left( G_{Li_2O_2^*} + G_{O_2} + 2G_{Li} \right) \quad (3)$$

where  $G_*$ ,  $G_{LiO_2^*}$ ,  $G_{Li_2O_2^*}$  and  $G_{(Li_2O_2)_2^*}$  represent the energies of the catalyst surface and the catalyst surface with  $LiO_2$ ,  $Li_2O_2$  and  $(Li_2O_2)_2$  adsorbates.  $G_{Li}$  and  $G_{O_2}$  are the energy of a single Li atom and an isolated gas molecule  $O_2$ . For each adsorption configuration, the Gibbs free energy should be corrected for the adsorption groups will vibrate at different orientations. The corrected value,  $\Delta E$  is obtained through VASPKIT software by the following equation:<sup>5</sup>

$$\Delta E = \text{ZPE} - TS \quad (4)$$

where ZPE, T and S are the zero-point energy, temperature, and entropy.

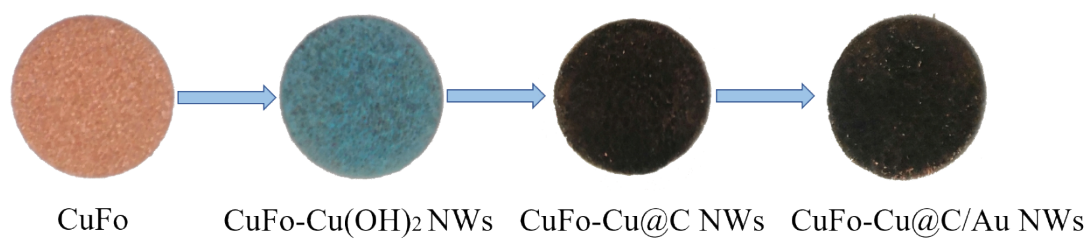

**Figure S1.** Optical photograph for the fabrication process of CuFo-Cu@C/Au NWs.

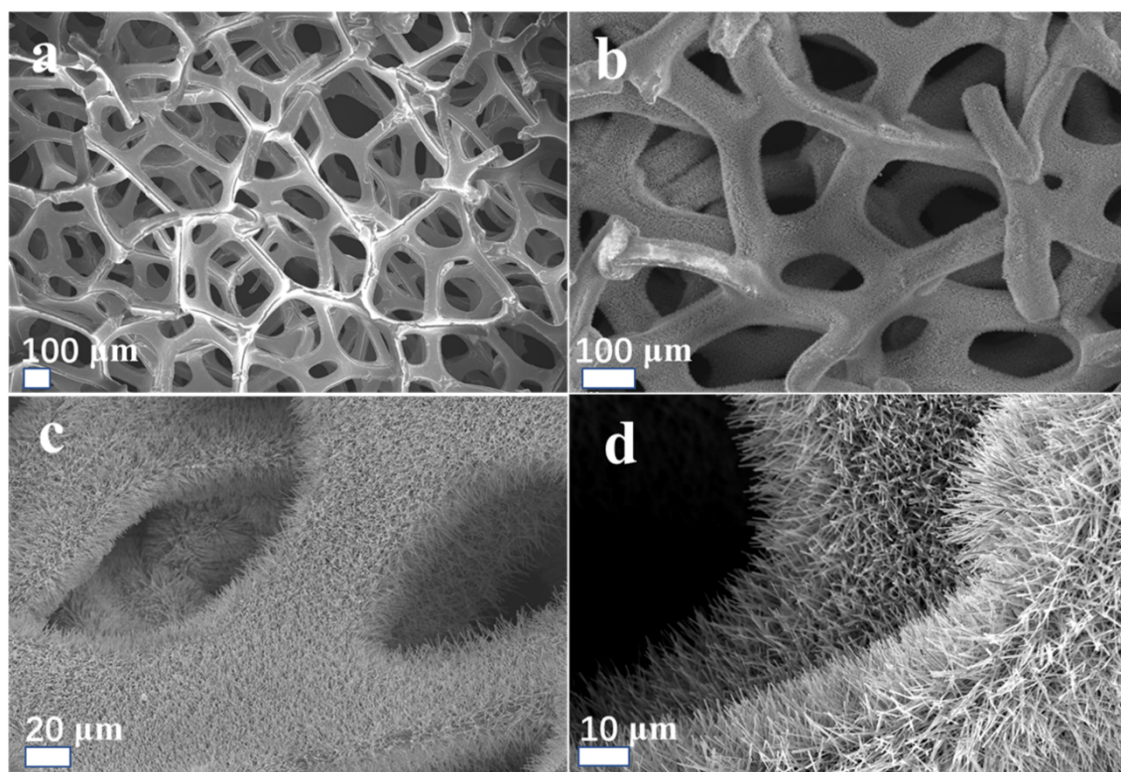

**Figure S2.** (a) SEM image of pure Cu foam. (b), (c) and (d) SEM images of CuFo supported  $\text{Cu}(\text{OH})_2$  nanowires, respectively. Obviously, a dense and uniform  $\text{Cu}(\text{OH})_2$  nanowires are grown on the surface of CuFo.



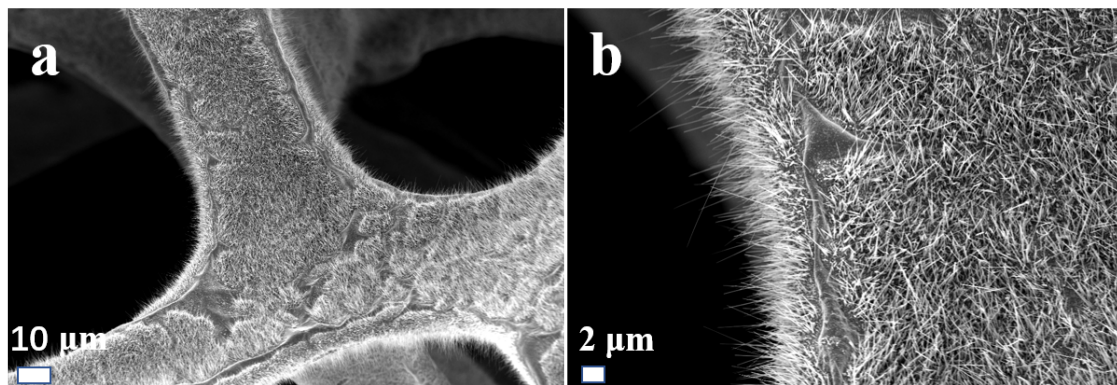

**Figure S3.** SEM images of the CuFo-CuO nanowires fabricated by thermal oxidation method. It should be noted that is very difficult to achieve dense and large-area uniform Cu-based nanowires on CuFo.

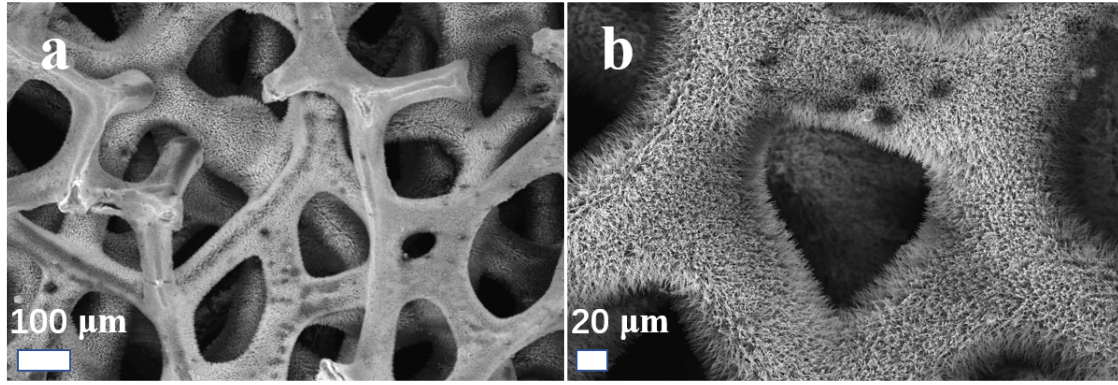

**Figure S4.** SEM images of CuFo-Cu(OH)<sub>2</sub>@RF nanowires.

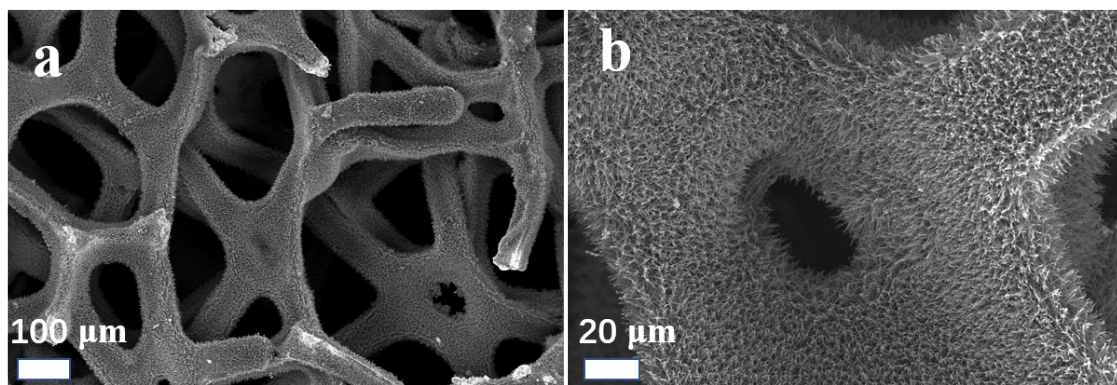

**Figure S5.** SEM images of CuFo-Cu@C nanowires under different magnifications. It can be clearly observed that the dense and uniform Cu@C core-shell nanowire supported on CuFo are well preserved without destruction after the reduction process due to the well-designed functional protecting layer.

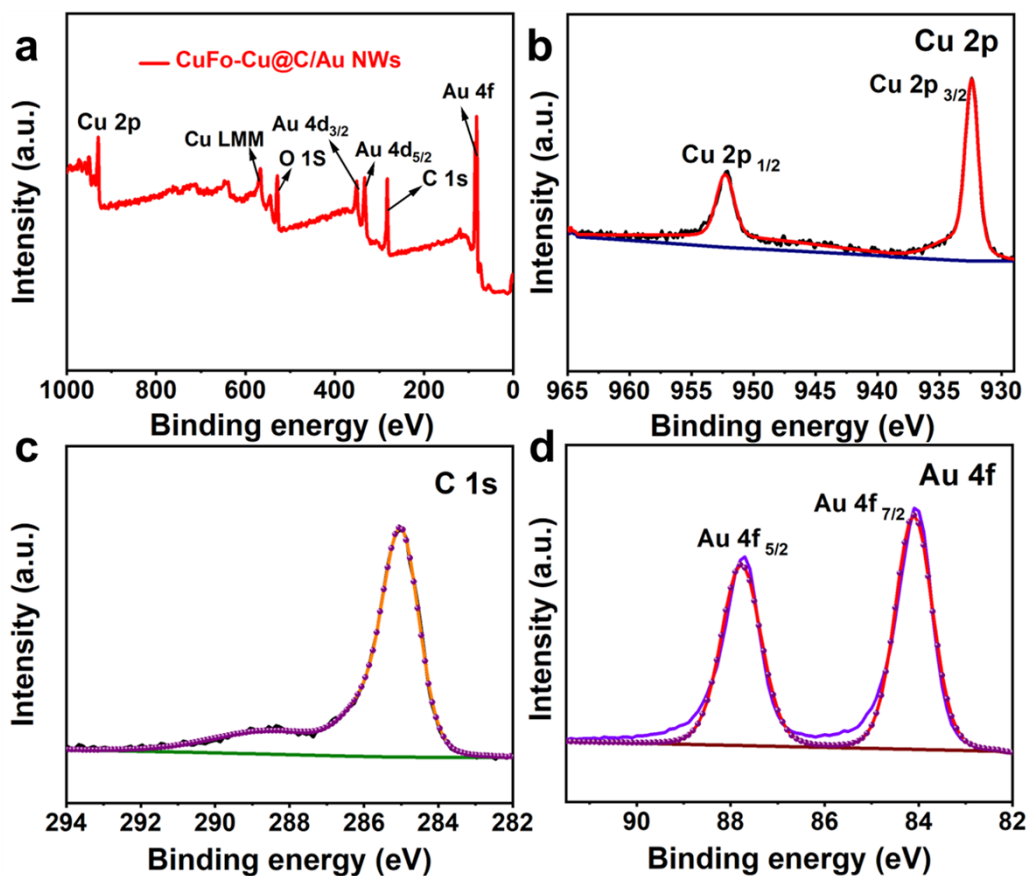

**Figure S6.** (a) XPS survey spectra of CuFo-Cu@C/Au NWs, (b) to (d) high-resolution XPS spectra of Cu 2p, C 1s and Au 4f, respectively.

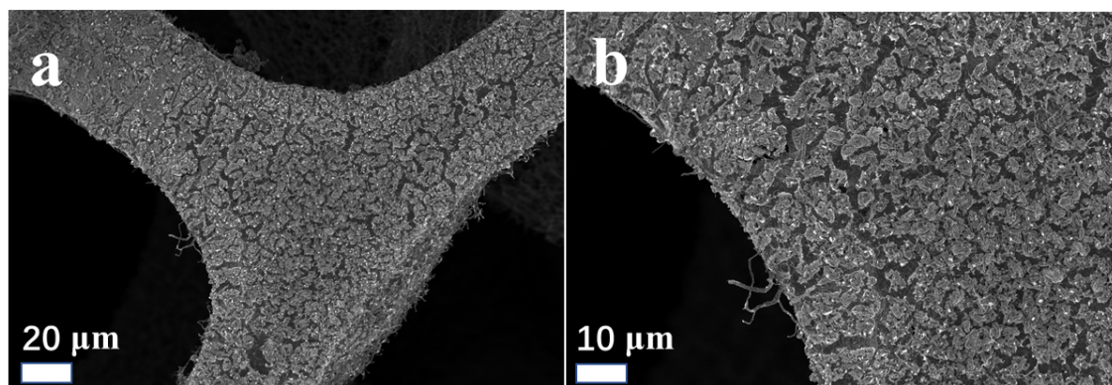

**Figure S7.** SEM images of the CuFo-Cu. The CuFo-Cu(OH)<sub>2</sub> nanowires without the functional protecting layer will result in the collapse of nanowire after the annealing reduction process, further demonstrating the importance of the protecting layer in the well-designed hierarchical structure.

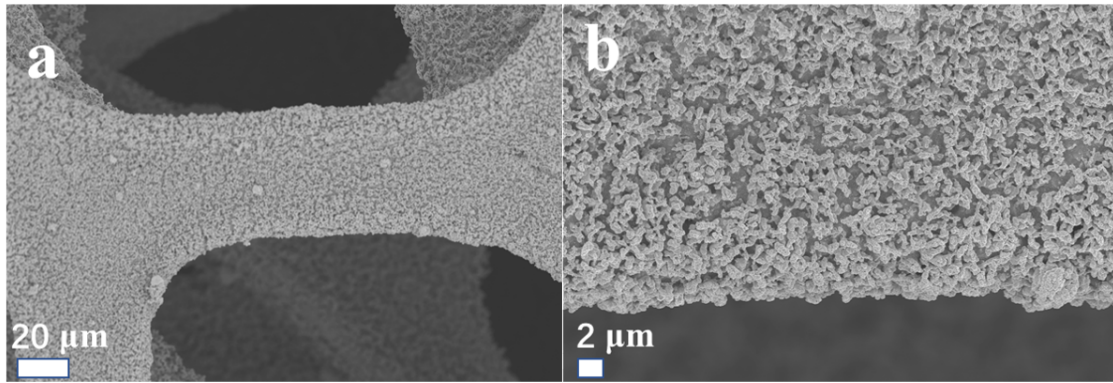

**Figure S8.** SEM images of the CuFo-Cu/Au as comparison sample.

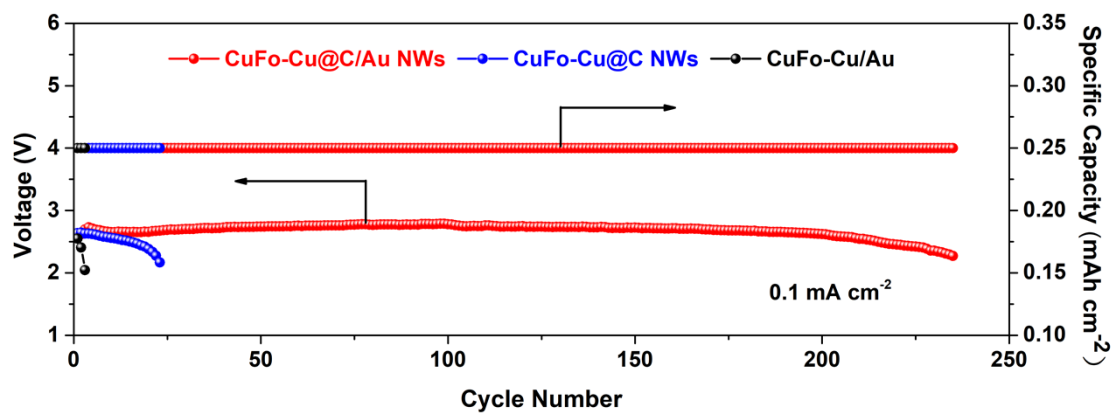

**Figure S9.** Discharge voltage versus cycle number for the cathodes of CuFo-Cu@C/Au NWs, CuFo-Cu@C NWs and CuFo-Cu/Au with 0.1 mA cm<sup>-2</sup> at a fixed capacity of 0.25 mAh cm<sup>-1</sup>.

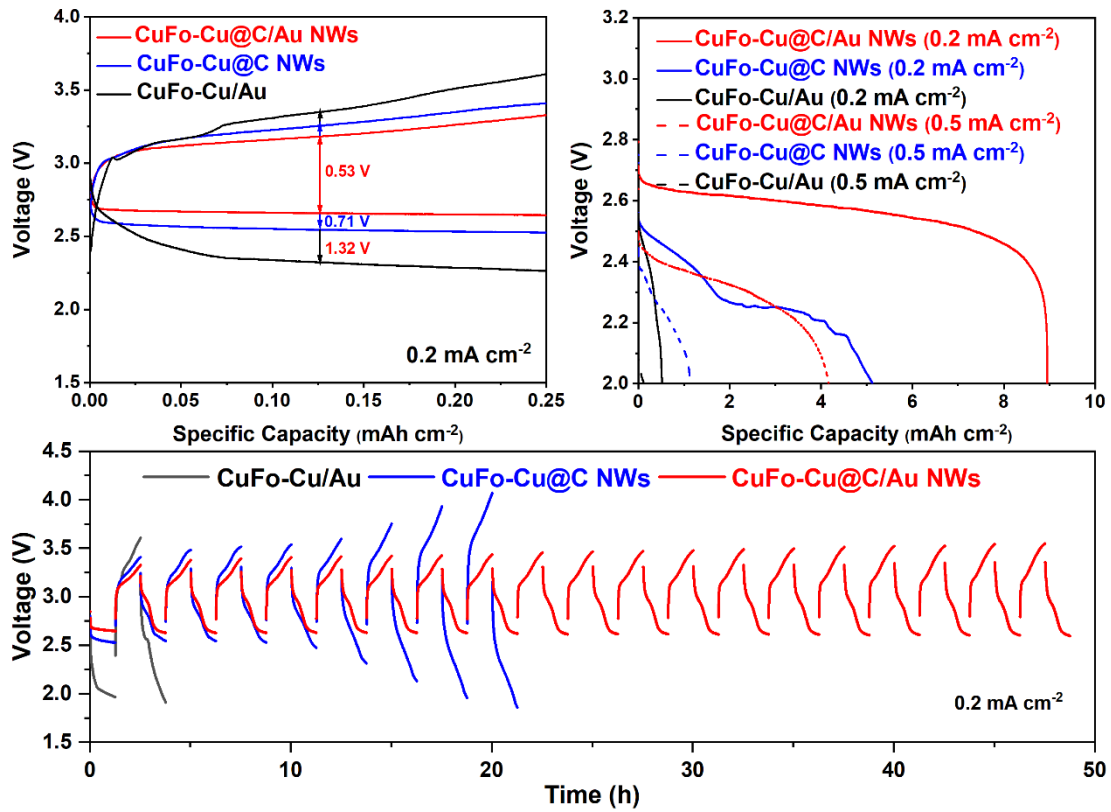

**Figure S10.** (a) initial discharge-charge profiles at  $0.2 \text{ mA cm}^{-2}$  with a limited capacity of  $0.25 \text{ mAh cm}^{-2}$ , (b) full discharge curve at two different current densities of  $0.2$  and  $0.5 \text{ mA cm}^{-2}$  with a cut-off voltage of  $2 \text{ V}$ , (c) cycling discharged/charged profiles at  $0.2 \text{ mA cm}^{-2}$  with  $0.25 \text{ mAh cm}^{-2}$ .



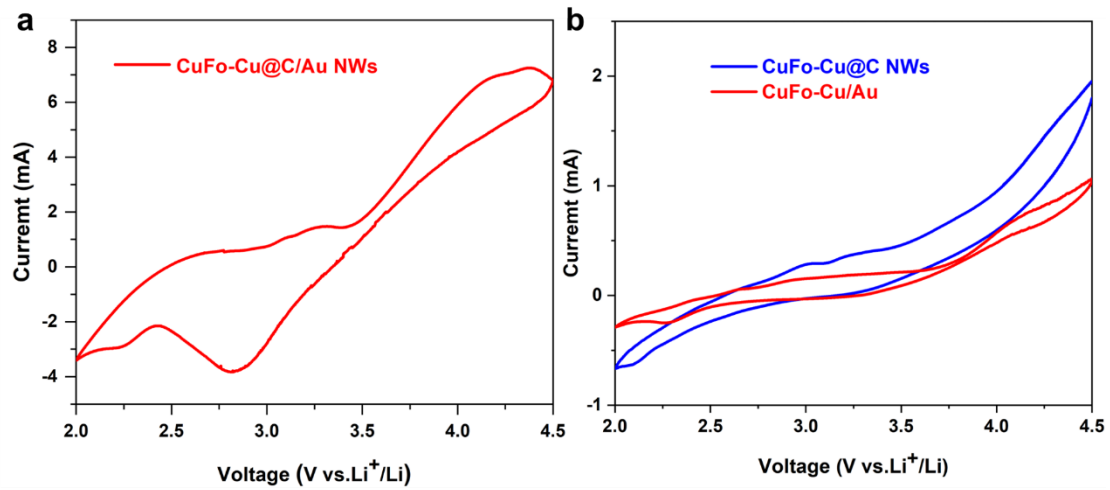

**Figure S11.** (a) CV curve of CuFo-Cu@C/Au NWs cathode at a sweeping rate of  $1 \text{ mV s}^{-1}$ , (b) CV curves of CuFo-Cu@C NWs and CuFo-Cu/Au cathodes at a sweeping rate of  $1 \text{ mV s}^{-1}$ .

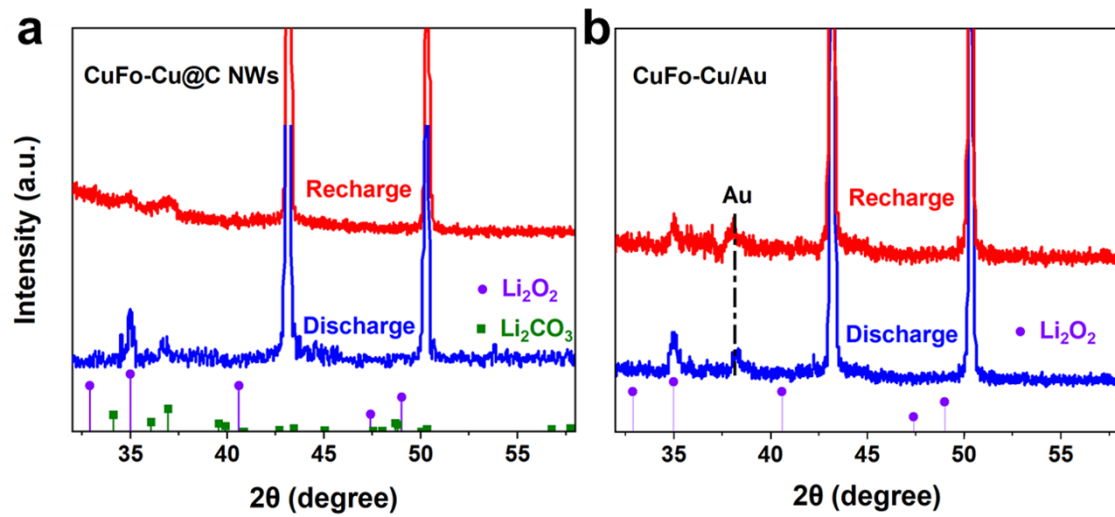

**Figure S12.** (a) XRD patterns of full discharge/recharge of CuFo-Cu@C NWs cathode; (b) XRD patterns of full discharge/recharge of CuFo-Cu/Au cathode.

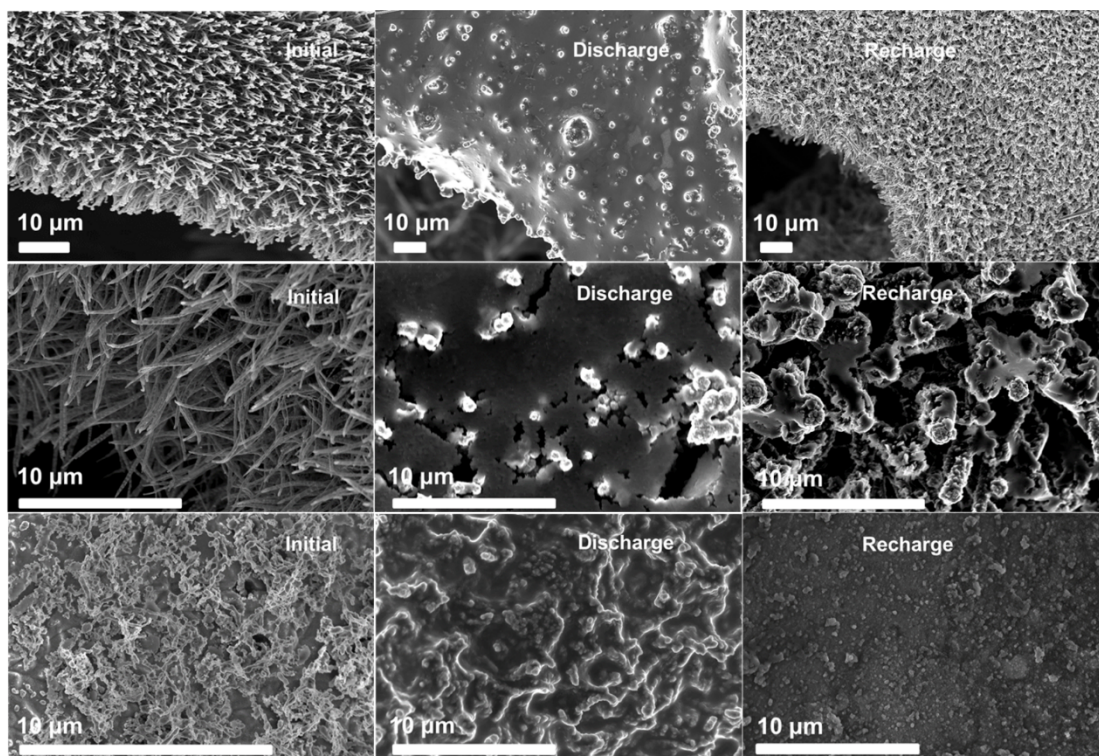

**Figure S13.** (a) to (c) SEM images of initial state, full discharge and recharge of CuFo-Cu@C/Au NWs, respectively; (d) to (f) SEM images of initial state, full discharge and recharge of CuFo-Cu@C NWs, respectively; (g) to (i) SEM images of initial state, full discharge and recharge of CuFo-Cu/Au NWs, respectively.

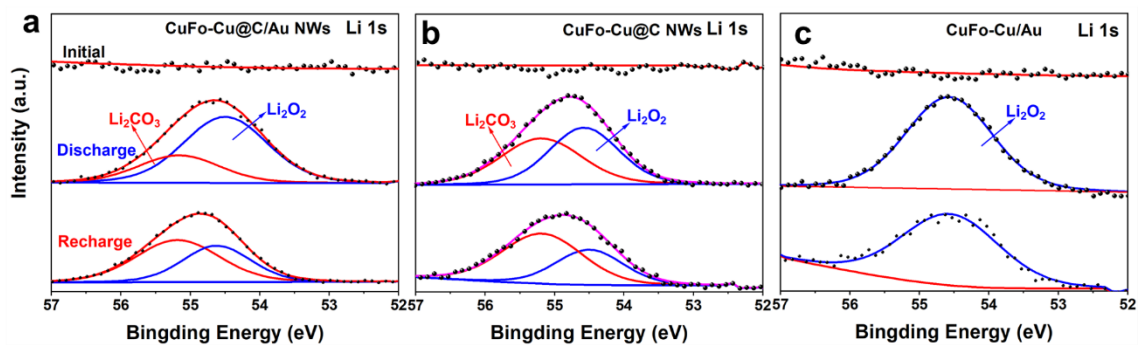

**Figure S14.** (a) to (c) XPS spectra of Li 1s for CuFo-Cu@C/Au NWs, CuFo-Cu@C NWs and CuFo-Cu/Au cathodes of initial state, full discharge-charge at  $0.1 \text{ mA cm}^{-2}$  with a cut-off discharge potential below 2 V and recharge potential over 4.5 V, respectively.

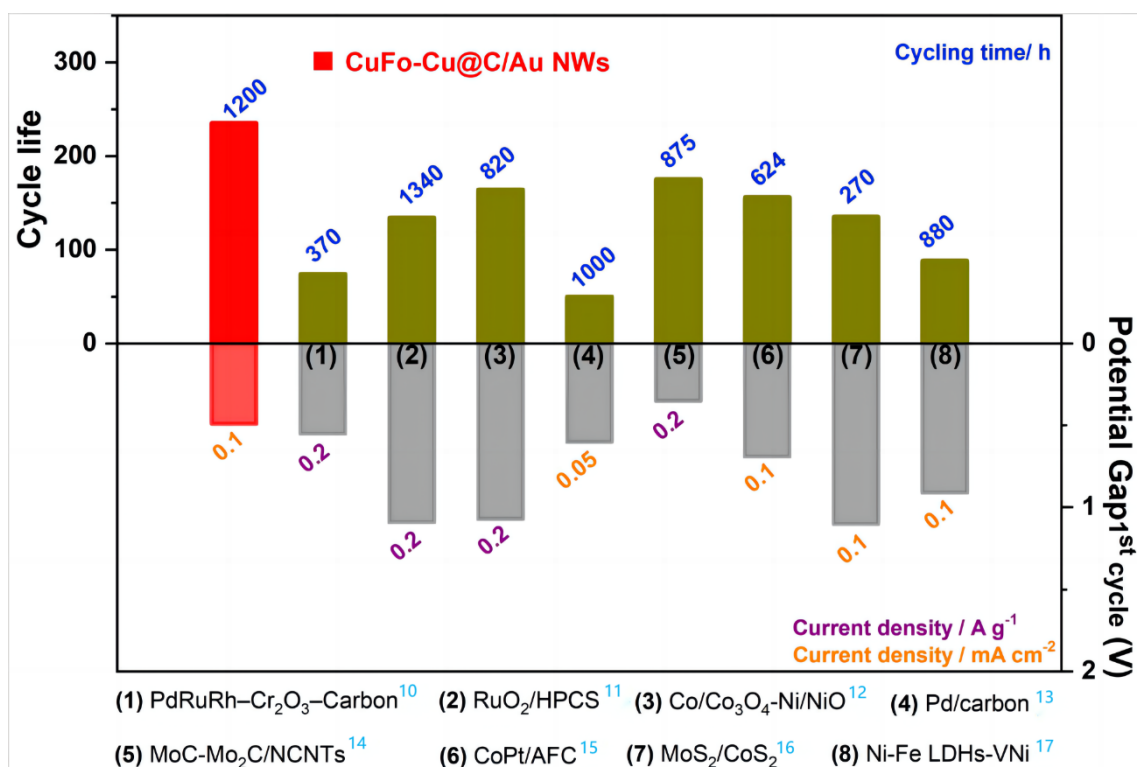

**Figure S15.** Superior cycling ability and small voltage gap under a high working current density in our work compared with previous reports.

## References

1. G. Kresse and J. Hafner, *Physical Review B*, 1993, **47**, 558-561.
2. G. Kresse and J. Hafner, *Physical Review B*, 1994, **49**, 14251-14269.
3. G. Kresse and D. Joubert, *Physical Review B*, 1999, **59**, 1758-1775.
4. P. E. Blöchl, *Physical Review B*, 1994, **50**, 17953-17979.
5. Z. Wu, Y. Yu, G. Zhang, Y. Zhang, R. Guo, L. Li, Y. Zhao, Z. Wang, Y. Shen and G. Shao, *Adv. Sci.*, 2022, **9**, e2200614.
6. Y. Mo, S. P. Ong and G. Ceder, *Chem. Mater.*, 2012, **24**, 15-17.
7. Y. Yu, Z. Wang and G. Shao, *J. Mater. Chem. A*, 2019, **7**, 10483-10493.
8. H. Xu, G. Cao, Y. Shen, Y. Yu, J. Hu, Z. Wang and G. Shao, *Energy Environ. Mater.*, 2022, **5**, 852-864.
9. X. Cao, C. Wei, X. Zheng, K. Zeng, X. Chen, M. H. Rummeli, P. Strasser and R. Yang, *Energy Stor. Mater.*, 2022, **50**, 355-364.
10. T. Li, Q. Dong, Z. Huang, L. Wu, Y. Yao, J. Gao, X. Wang, H. Zhang, D. Wang, T. Li, R. Shahbazian-Yassar and L. Hu, *Adv. Mater.*, 2022, **34**, e2106436.
11. Z. Lian, Y. Lu, S. Zhao, Z. Li and Q. Liu, *Adv. Sci.*, 2023, **10**, e2205975.
12. L. Peng, J. Wang, S. Guo and C. Li, *Chem. Eng. J.*, 2022, **450**, 138252.

13. T. Zhang, B. Zou, X. Bi, M. Li, J. Wen, F. Huo, K. Amine and J. Lu, *ACS Energy Lett.*, 2019, **4**, 2782-2786.
14. Y. J. Oh, J. H. Kim, J. Y. Lee, S.-K. Park and Y. C. Kang, *Chem. Eng. J.*, 2020, **384**, 123344.
15. H. Xia, Q. Xie, Y. Tian, Q. Chen, M. Wen, J. Zhang, Y. Wang, Y. Tang and S. Zhang, *Nano Energy*, 2021, **84**, 105877.
16. D. Li, L. Zhao, Q. Xia, L. Liu, W. Fang, Y. Liu, Z. Zhou, Y. Long, X. Han, Y. Zhang, J. Wang, Y. Wu and H. Liu, *Small*, 2022, **18**, e2105752.
17. Y. Zhou, D. Yan, Q. Gu, S. Zhu, L. Wang, H. Peng and Y. Zhao, *Appl. Catal. B*, 2021, **285**, 119792.
